# Supplementary material
Source: PubMed Central journal article supplement (PMC4337821)
Supplement: NIHMS661034-supplement-Supporting_Information.pdf [file NIHMS661034-supplement-Supporting_Information.pdf]

Supplementary Table 1. Lipid internal standards used in LC-MS analysis

| Lipid class | Species |
|-------------|---------|
| PtdOH       | 25:0    |
|             | 31:1    |
|             | 37:4    |
|             | 43:6    |
| PC          | 25:0    |
|             | 31:1    |
|             | 37:4    |
|             | 43:6    |
| PE          | 25:0    |
|             | 31:1    |
|             | 37:4    |
|             | 43:6    |
| PG          | 25:0    |
|             | 31:1    |
|             | 37:4    |
|             | 43:6    |
| PS          | 25:0    |
|             | 31:1    |
|             | 37:4    |
|             | 43:6    |
| PI          | 25:0    |
|             | 31:1    |
|             | 37:4    |
|             | 43:6    |

Supplementary Table 2. Species distribution of phospholipids and sphingolipids detected in A549 cells after treatment with wildtype (WT) or mutant (K169E) PldA.

| Lipid class | Species    | Treatment       |                    | Lipid class | Species | Treatment       |                    |       |
|-------------|------------|-----------------|--------------------|-------------|---------|-----------------|--------------------|-------|
|             |            | WT <sup>a</sup> | K169E <sup>a</sup> |             |         | WT <sup>a</sup> | K169E <sup>a</sup> |       |
| PtdOH       | 30:1       | 14.9%           | 8.1%               | PC          | 30:0    | 2.0%            | 2.1%               |       |
|             | 32:1       | 6.4%            | 15.4%              |             | 32:1    | 10.1%           | 9.8%               |       |
|             | 34:2       | 3.5%            | 9.0%               |             | 32:0    | 2.8%            | 2.6%               |       |
|             | 34:1       | 22.2%           | 23.8%              |             | 34:1e   | 5.4%            | 5.4%               |       |
|             | 36:2       | 22.3%           | 27.1%              |             | 34:2    | 5.6%            | 5.5%               |       |
|             | 36:1       | 30.7%           | 16.6%              |             | 34:1    | 16.1%           | 15.6%              |       |
| PE          |            |                 |                    |             | 36:4e   | 3.0%            | 3.1%               |       |
|             | 30:1       | 0.3%            | 0.3%               |             | 36:2e   | 2.9%            | 3.0%               |       |
|             | 32:1       | 2.2%            | 0.9%               |             | 36:1e   | 3.1%            | 3.3%               |       |
|             | 34:1p      | 3.3%            | 3.5%               |             | 36:0e   | 2.5%            | 2.6%               |       |
|             | 34:2       | 3.2%            | 1.9%               |             | 36:4    | 6.4%            | 7.1%               |       |
|             | 34:1       | 4.8%            | 3.8%               |             | 36:3    | 5.9%            | 5.9%               |       |
|             | 36:4p      | 11.9%           | 12.6%              |             | 36:2    | 18.3%           | 18.1%              |       |
|             | 36:3p      | 2.3%            | 2.4%               |             | 36:1    | 8.3%            | 8.6%               |       |
|             | 36:2p      | 1.2%            | 1.3%               |             | 38:6    | 2.5%            | 2.3%               |       |
|             | 36:1p      | 1.6%            | 1.4%               |             | 38:5    | 5.2%            | 5.0%               |       |
|             | 36:4       | 3.6%            | 3.6%               | PI          |         |                 |                    |       |
|             | 36:3       | 1.6%            | 1.8%               |             |         | 36:2            | 5.7%               | 5.6%  |
|             | 36:2       | 6.8%            | 6.0%               |             |         | 36:1            | 3.4%               | 3.6%  |
|             | 36:1       | 4.2%            | 4.1%               |             |         | 38:5            | 10.3%              | 10.5% |
|             | 36:0/38:6p | 4.5%            | 4.5%               |             |         | 38:4            | 52.4%              | 52.8% |
|             | 38:5p      | 7.2%            | 7.7%               |             |         | 38:3            | 19.3%              | 18.7% |
|             | 38:4p      | 9.3%            | 10.1%              |             |         | 40:6            | 2.7%               | 2.5%  |
|             | 38:5       | 8.4%            | 8.8%               |             |         | 40:5            | 3.2%               | 3.2%  |
|             | 38:4       | 17.9%           | 19.0%              |             |         | 40:4            | 3.1%               | 3.0%  |
| 38:3        | 3.6%       | 4.0%            | PS                 |             |         |                 |                    |       |
| 40:6        | 2.2%       | 2.3%            |                    |             | 34:1    | 15.4%           | 15.4%              |       |
| PG          |            |                 |                    |             |         | 36:2            | 10.2%              | 10.2% |
|             | 34:1       | 42.3%           |                    | 46.8%       |         | 36:1            | 32.9%              | 32.9% |
| SM          | 36:2       | 57.7%           |                    | 53.2%       |         | 38:5            | 5.9%               | 5.8%  |
|             |            |                 |                    |             | 38:4    | 23.5%           | 23.8%              |       |
|             | d18:1/16:0 | 80.0%           | 80.2%              |             | 38:0    | 6.8%            | 6.6%               |       |
|             | d18:2/22:0 | 20.0%           | 19.8%              |             | 40:6    | 5.1%            | 5.2%               |       |
|             |            |                 | BMP                |             |         |                 |                    |       |
|             |            |                 |                    |             | 40:7    | 100%            | 100%               |       |

<sup>a</sup>Shown are mean values.
